# Supplementary material for: Nicastrin Is Dispensable for γ-Secretase Protease Activity in the Presence of Specific Presenilin Mutations
Source: PubMed Central journal article supplement — J Biol Chem. 2009 May 8;284(19):13013–22. doi: 10.1074/jbc.M807653200 (PMC2676034; doi:10.1074/jbc.m807653200), 2009-05-08
Supplement: M807653200_2.pdf [file M807653200_2.pdf]

Supplemental Table S1. Activity of PS1 mutants, F411Y/S438X or F411X/S438P, in the absence of NCT.

| The primary mutation                                                                                                                  | The secondary mutation                                                                | Growth of cells <sup>a</sup> |
|---------------------------------------------------------------------------------------------------------------------------------------|---------------------------------------------------------------------------------------|------------------------------|
| S438P                                                                                                                                 | F411Y                                                                                 | +++                          |
| S438P                                                                                                                                 | F411, F411G, F411P, F411A, F411I, F411M, or F411V                                     | +                            |
| S438P                                                                                                                                 | F411R, F411D, F411K, F411H, F411E, F411S, F411T, F411N, F411Q, F411C, F411L, or F411W | -                            |
| S438, S438R, S438H, S438K, S438D, S438E, S438T, S438N, S438Q, S438C, S438G, S438A, S438I, S438L, S438M, S438F, S438W, S438V, or S438Y | F411Y                                                                                 | -                            |

<sup>a</sup> The growth of cells with PS1 mutants, F411Y/S438X and F411X/S438P, were analyzed on SD-LWHUAde medium after 3 days at 30°C. (X indicates the substitution to possible amino acids.) All cells contains C1-55-Gal4p, Aph-1, Pen2. "+++" represents the full growth; cells formed colonies (>1mm). "+" represents partial growth; cells formed small colonies (<1mm, as shown in Figure 2B, "S438P no NCT"). "-" represents no growth.
